# Supplementary material for: Quantifying individual variability in exposure risk to mosquito bites in the Cascades region, Burkina Faso
Source: Research Square preprint supplement (doi:10.21203/rs.3.rs-15775/v2), 2020-10-16
Supplement: Supplementary file 1 [file c6db6c6d6407d3cd7eb4773e.docx]

, [1]

, [2]

, [3]

, [4]
